# Supplementary material
Source: HighWire-hosted journal article supplement (https://jitc.bmj.com/content/11/2/e006234)

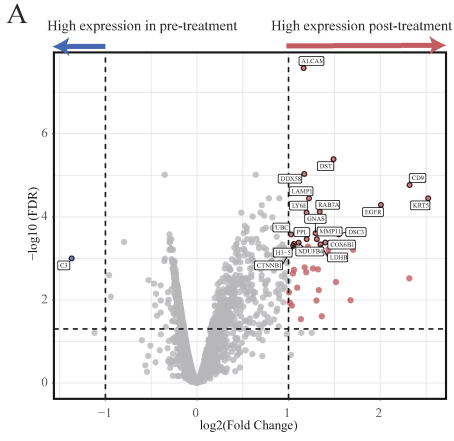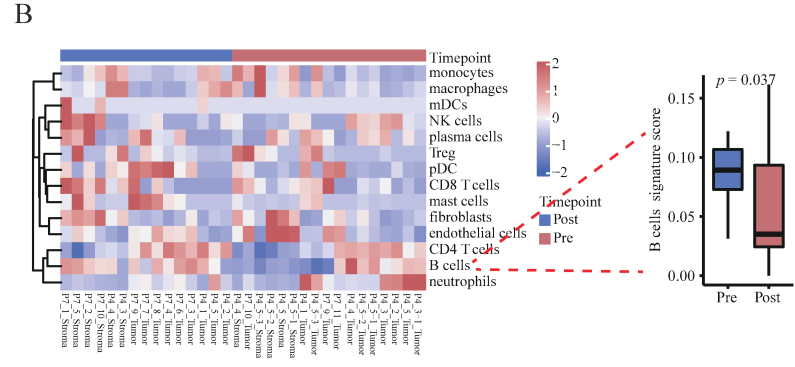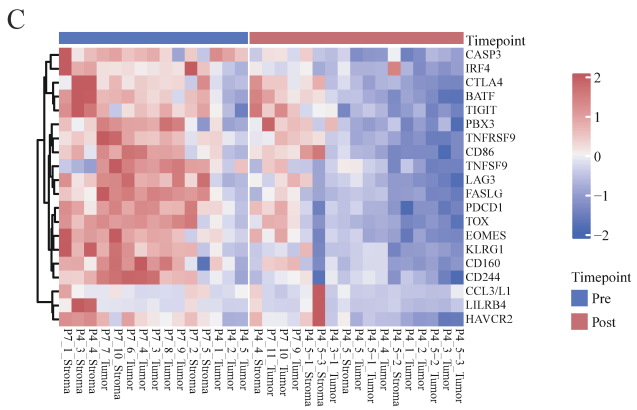

Supplement: inline-supplementary-material-17 [file inline-supplementary-material-17.pdf]
